# Supplementary material for: Proper micro-environment alleviates mortality in laboratory mouse breeding induced by litter overlap and older dams
Source: PubMed Central journal article supplement — Commun Biol. 2024 Aug 17;7:1008. doi: 10.1038/s42003-024-06654-z (PMC11330512; doi:10.1038/s42003-024-06654-z), 2024-08-17
Supplement: 42003_2024_6654_MOESM2_ESM.pdf [file 42003_2024_6654_MOESM2_ESM.pdf]

1 SUPPLEMENTARY MATERIAL  
2 LITTER CHARACTERISTICS  
3

4 **Note 1. Litter Social Characteristics**

5 **Note 1.1 Dams**

6 Litters were born to dams which were  $174 \pm 73$  d old on average. The youngest and oldest  
7 dams in this study were 58 d and 493 d old, respectively. Young dams ( $\leq 80$  d of age) gave birth  
8 to 7.3% of the studied litters, while older dams ( $\geq 250$  d of age) gave birth to 12.6% of the litters.  
9 Most (83.1%) of the litters were born to dams of 80 to 260 days of age, with 54.6% of the litters  
10 being born to dams between 110 and 210 days of age. Suppl. Fig. 1a depicts the percentage of  
11 litters born per distinct category of Dam Age considering overlapped and non-overlapped litters.

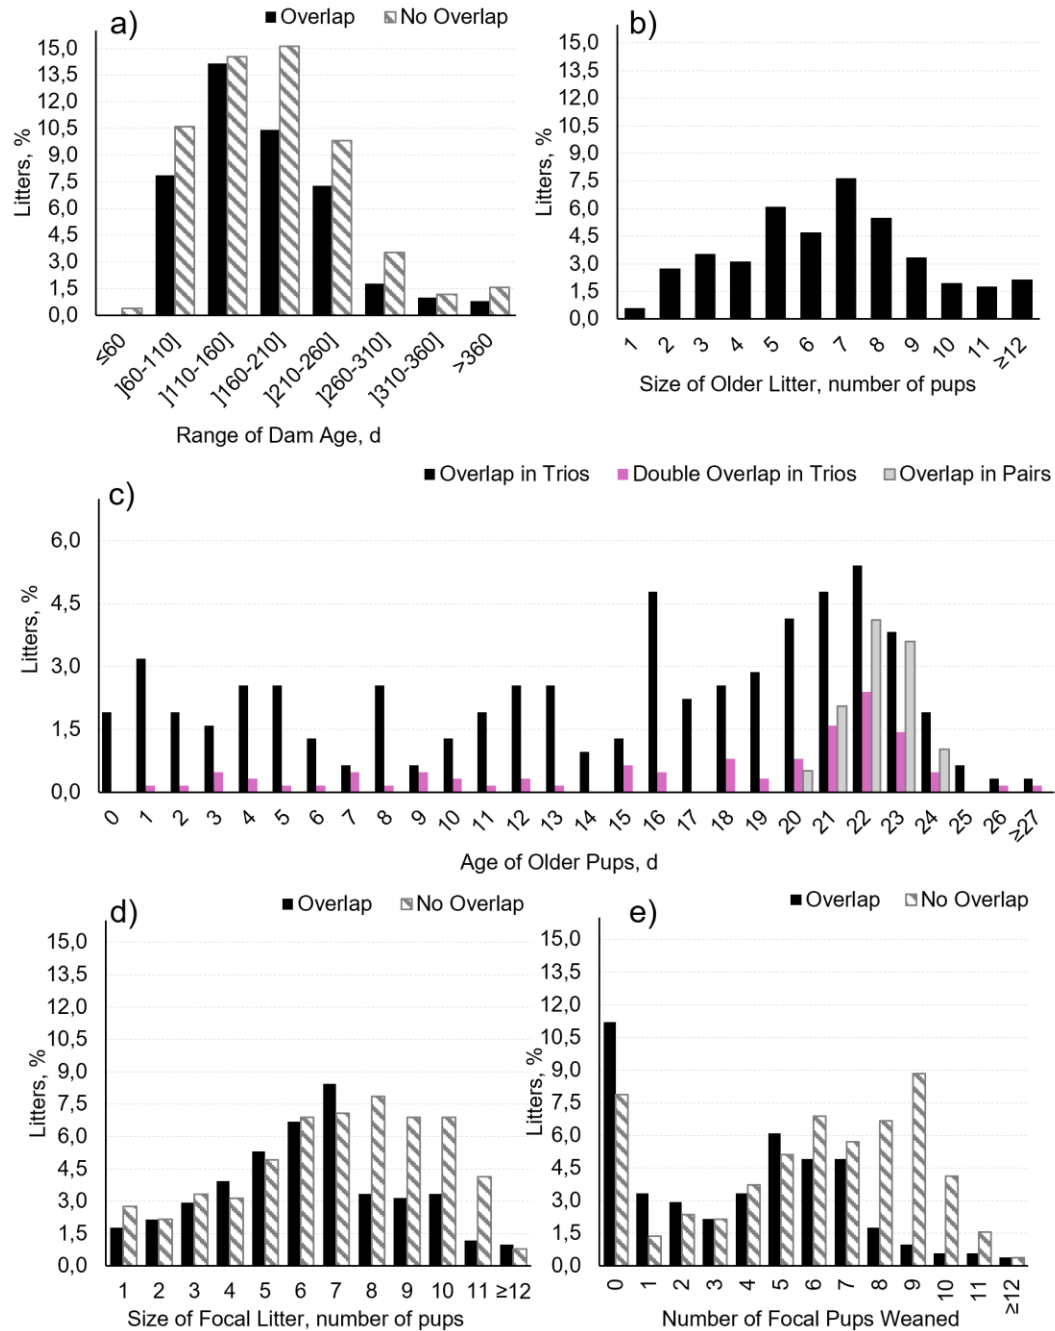

12

13 **Suppl. Fig. 1. Overall litter characteristics.** Percentage of litters by category of: a) Dam  
 14 Age; b) Size of Older Litter on the day of the Focal Litter's birth; c) Age of the Older Litter and  
 15 overlap condition. Double Overlap means that the Focal Litter was born in the presence of two  
 16 Older Litters. In Trio Double Overlapped litters, the Age of the Older litter represents the weighted  
 17 age of both older litters; d) Size of Focal Litter, and; e) Number of Pups Weaned.

18

19 **Note 1.2 Size and Age of overlapped Older Litters**

20 A total of 43.2% of all the studied litters (pairs and trios included) were overlapped (n=220  
21 litters), which means that 40.7% (n=1377) of all pups (n=3380) were born in the presence of an  
22 older litter. Litter Overlap occurred in 63.1% and 11.3% of all trio- (n=314) and pair-housed  
23 (n=195) litters, respectively.

24 Mean size of the older litters (number of pups) in situations of Litter Overlap was  $6.7 \pm 3.1$   
25 pups on the day that the focal litter was born. Most (55.5%) of the older litters had five to eight  
26 pups. Approximately 23.2% and 21.4% of the overlapped litters were born in the presence of older  
27 litters with four or less pups and nine or more pups, respectively. Approximately 4.1% of the  
28 overlapped focal litters were born in cages with large older litters, i.e. of 15 or more pups with a  
29 maximum of 18 older pups. The 18-pup litter happened in a trio-cage where two older litters were  
30 present (double overlap). Double overlapped litters happened either when the cage-mate female  
31 had pups (Older Litter 2) just before her previous litter was weaned (Older Litter 1), or when the  
32 dam gave birth to the focal litter just before weaning her previous litter (Older Litter 1) and in the  
33 presence of the cage-mate female's litter (Older Litter 2). Suppl. Fig. 1b depicts the percentage  
34 of litters per category of size of the older litter present in the cage at the time of the birth of the  
35 focal litter in overlapped conditions.

36 Older pups in situations of Litter Overlap were on average  $15.0 \pm 7.7$  d old on the day that the  
37 focal litter was born (Day 0). The mode age for older litters on Day 0 was 22.0 d, which happened  
38 in 24 litters, corresponding to 10.9% of the total overlapped litters (n=220). Most of the new-born  
39 overlapped litters (72.3%) were born in the presence of older litters of 10 d to 25 d of age. The  
40 breeding facility's protocol was to wean pups when these were approximately 21.0 days old (see  
41 Table 1) but would sometimes wean pups at an older age for reasons including low weight/vigour  
42 at 21.0 d of age or welfare and logistic issues in the breeding rooms that prevented litters being  
43 weaned at the target age. Minimum Age of the Older Litters was 0 d (older litters that were born  
44 on the same day as the focal litter), while the observed maximum Age of the Older Litters was 32

45 d in only one cage. Approximately 25.9% of the older litters in situations of Litter Overlap were  
46 22.0 d-old or older, but only 1.8% of the older litters had 25.0 d-old pups or older. A total of 19.5%  
47 of the older litters had pups which were five or less days old.

48 Overlap in cages with pairs had a smaller distribution of age gaps between litters (within 20 d  
49 to 24 d), as pair-overlapped litters were necessarily from the same dam which had given birth just  
50 before weaning the older litter. In trios, however, litters could be from both the two dams present  
51 in the cage, which means that there was a much wider range for the distribution of age gap  
52 between litters (from 0 d to 32 d), as depicted in Suppl. Fig. 1c. Still, approximately 19.8% of the  
53 trio-litters were overlapped with litters aged within the same range as in pairs (20 d to 24 d), and  
54 21.3% of trio-litters had Litter Overlap with age gaps of 20 d or more. Also, 20.2% (n=40) of all  
55 trio-overlapped litters (n=198) had double overlap, corresponding to 12.7% of all studied trios (Fig.  
56 1c).

### 57 **Note 1.3 Size of Focal Litter at birth and at weaning**

58 A total of 3380 pups were born during the present study. The mean number of pups born in  
59 focal litters (i.e. number of pups found in the first cage check after birth) was  $6.6 \pm 2.8$  (range 1-  
60 14 pups). The majority of litters (70.7%) were born having five to 10 pups, of which 56.9% were  
61 six to eight pups. The smallest litters had only one pup (4.5% of the litters) while the largest litters  
62 had a total of 14 pups (two cases, 0.4% of litters). A total of 15.1% of the litters were born with  
63 three pups or less, and 17.1% of litters had at least 10 pups. Suppl. Fig. 1d depicts the distribution  
64 of litters by Size of Focal Litter, considering litters with and without overlap.

65 A total of 2515 pups were weaned during this study. The mean number of pups weaned in  
66 focal litters was  $4.9 \pm 3.0$  (range 0-13 pups). A total of 19.1% of the litters were totally lost, meaning  
67 that these litters weaned zero pups, while 33.6% of the litters weaned five to seven pups, and  
68 25.1% of litters weaned eight to 11 pups. Suppl. Fig. 1e depicts the distribution of focal litters per

69 category of number of pups weaned per focal litter, considering overlapped and non-overlapped  
70 litters.

71        Approximately 30.0% and 22.7% of all the studied litters were weaned on Fridays and  
72 Mondays, respectively. The same pattern was found for overlapped (Fridays: 33.2%, Mondays:  
73 24.1%) and double overlapped litters (Monday and Friday: 29.8%).

74

75

76 **Note 2. Litter Micro-Environment**

77 **Note 2.1 Motion Events near the Cage**

78 A total of 3308 Motion Events were detected by the proximity logger, between the racks that  
79 contained the study cages, during the litters' respective Day 0. Mean incidence of Motion Events  
80 on the litters' Day 0 was  $19.2 \pm 15.7$  events per litter with a mean duration of  $103.1 \pm 51.1$  s per  
81 event. Nearly half (51.2%, n= 88) of the litters experienced 15 human Motion Events or less (low  
82 incidence), while the remaining litters experienced 16 to 77 human Motion Events (high incidence)  
83 on Day 0. Most of the litters which experienced low incidence of Motion Events were born either  
84 on weekends (61.4%, n=54) or on Mondays (19.3%, n=17). On the other hand, most of the litters  
85 that experienced high incidence of Motion Events were born between Tuesdays and Fridays  
86 (n=72, 81.8%), as illustrated on Suppl. Fig. 2.

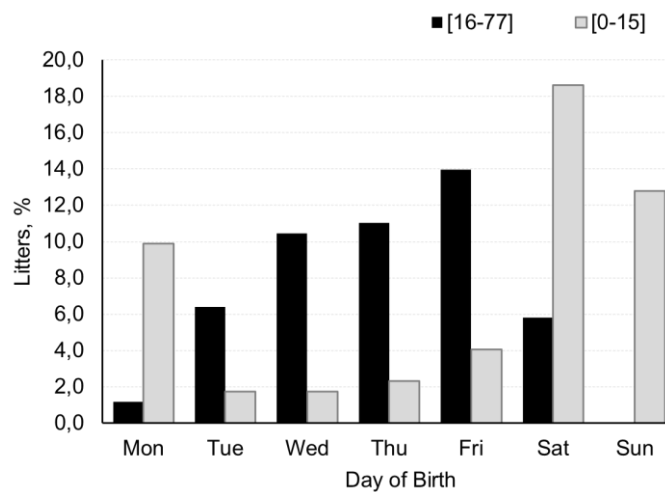

87

88 **Suppl. Fig. 2. Human movements in the room.** Percentage of litters by category of Motion  
89 Events detected throughout Day 0, being 0 – 15 events and 16-77 events considered low and  
90 high categories, respectively.

91

92 The lower incidence of movements during the weekend can be explained by the fact that the  
93 breeding facility only had one animal caretaker on weekends. The reduced incidence of  
94 movements on Mondays may be reflecting the reduced cage changes during this weekday, in

95 comparison with the remaining weekdays. Also, the weekly staff meetings shortened the workday  
96 inside the breeding rooms by at least one hour on Mondays.

97

98 **Note 2.2 Cage Vibration**

99 Acceleration loggers registered - 0.2 to 0.0 g-force ( $-2.0$  to  $0.0$   $\text{m}\cdot\text{s}^{-2}$ ) for  $93.4 \pm 24.5\%$ ,  $90.9$   
100  $\pm 26.1\%$  and  $71.2 \pm 38.8\%$  of the litters respective Day 0 on the vertical, and horizontal directions  
101 of the cage's width and length, respectively. Mean Cage Vibration on Day 0 was  $0.1 \pm 0.3$  g-force  
102 ( $1.1 \pm 2.5$   $\text{m}\cdot\text{s}^{-2}$ ) and  $0.3 \pm 0.3$  g-force ( $2.9 \pm 3.1$   $\text{m}\cdot\text{s}^{-2}$ ) considering the vertical axis alone and the  
103 three directions together, respectively. The maximum absolute level of acceleration recorded  
104 during Day 0 was 2.0 g-force ( $19.6$   $\text{m}\cdot\text{s}^{-2}$ ), 0.9 g-force ( $9.1$   $\text{m}\cdot\text{s}^{-2}$ ) 1.28 g-force ( $12.5$   $\text{m}\cdot\text{s}^{-2}$ ), on the  
105 vertical, horizontal cage width and length directions, respectively.

106 **Note 2.3 Cage Light Intensity**

107 All litters experienced complete or near complete darkness (0.00-2.00 Lx) for at least 60% of  
108 Day 0. On average, litters experienced 2.00 Lx or less for  $97.0 \pm 7.5\%$  of Day 0, which means  
109 that the inside of cages remained dark for most of the diurnal and nocturnal periods. Cage Light  
110 Intensity was generally low,  $0.90 \pm 1.90$  Lx, but a total of 20.4%, 11.6%, 7.0%, 4.1%, and 2.9% of  
111 all studied litters experienced light levels of or over 25.00 Lx, 50.00 Lx, 100.00 Lx, 200.00 Lx, and  
112 400.00 Lx, respectively, at least once during their respective Day 0. The minimum and maximum  
113 light intensities experienced by a litter during this period was 0.00 Lx and 979.50 Lx, respectively.

114 **Note 2.4 Cage Temperature**

115 Mean Cage Temperature for the entire Day 0 ranged from  $20.3^{\circ}\text{C}$  to  $23.9^{\circ}\text{C}$ . Litters  
116 experienced momentary cage temperatures from  $18.8^{\circ}\text{C}$  to  $24.7^{\circ}\text{C}$  within Day 0. The most  
117 recurrent temperature range inside the cages was  $22.0^{\circ}\text{C}$  to  $22.9^{\circ}\text{C}$ , within which 52.3% of the  
118 litters spent at least half of their respective Day 0. However, only 35.5% and 12.2% of the litters  
119 spent at least 70.0% and 90.0% of their Day 0 within this temperature interval, respectively. Cage

120 Temperature was highly variable within this period. On average, new-born pups experienced less  
121 than 21.0°C for  $8.3 \pm 20.6\%$ , 21.0-21.9°C for  $37.3 \pm 35.1\%$ , 22.0-22.9°C for  $47.0 \pm 36.0\%$ , and  
122 over 23.0°C for  $7.2 \pm 15.9\%$  of their Day 0. The minimum and maximum variation in temperature  
123 experienced by the same litter within Day 0 was of 0.4°C and 4.0°C, respectively. Cage  
124 temperature fluctuations of at least 2.0°C,  $\geq 1.5^\circ\text{C}$ ,  $\geq 1.0^\circ\text{C}$ , and  $\geq 0.5^\circ\text{C}$  were experienced by 8.1%,  
125 29.1%, 66.3%, and 98.3% litters, respectively, within Day 0.

126 **Note 2.5 Nest Score**

127 Mean nest score across all 172 litters was  $2.45 \pm 1.52$ . Nests scores of 0.00-0.75, 1.00-1.75,  
128 2.00-2.75, 3.00-3.75, 4.00-5.00 were observed on Day 0 for 16.9%, 18.6%, 26.2%, 16.3%, and  
129 22.1 of litters, respectively.

130

131



**SUPPLEMENTARY MATERIAL**  
**TABLES AND STATISTICAL RESULTS**

132  
133  
134

135 **Suppl. Table 1. Final model solutions for fixed effects for predicting the odds of pup**  
136 **death fitted in the whole dataset (Model 1).** n.a.: not applicable. DF: Degrees of Freedom.

| Effect                                                             | Estimate | Standard Error | DF   | t-value | Adj. P <  t |
|--------------------------------------------------------------------|----------|----------------|------|---------|-------------|
| Intercept                                                          | 1.5341   | 0.9682         | 504  | 1.58    | 0.1137      |
| No Overlap                                                         | -0.2911  | 0.7584         | 2893 | -0.38   | 0.7012      |
| Overlap                                                            | 0.0000   | n.a.           | n.a. | n.a.    | n.a.        |
| Size of Focal Litter                                               | -1.0738  | 0.2352         | 2893 | -4.56   | <0.0001     |
| Size of Focal Litter × Size of Focal Litter<br>(second order term) | 0.0675   | 0.0160         | 2893 | 4.21    | <0.0001     |
| Dam Age, d                                                         | 0.0095   | 0.0020         | 2893 | 4.64    | <0.0001     |
| Size of Focal Litter × No Overlap<br>(interaction)                 | -0.2416  | 0.1033         | 2893 | -2.34   | 0.0194      |
| Size of Focal Litter × Overlap<br>(interaction)                    | 0.0000   | n.a.           | n.a. | n.a.    | n.a.        |

137  
138  
139  
140

**Suppl. Table 2. Final model solutions for fixed effects for predicting the odds of pup**  
**death fitted in the dataset containing only overlapped litters (Model 2).** n.a.: not applicable.  
DF: Degrees of Freedom.

| Effect                                                          | Estimate | Standard Error | DF   | t-value | Adj. P <  t |
|-----------------------------------------------------------------|----------|----------------|------|---------|-------------|
| Intercept                                                       | -5.5246  | 1.6075         | 211  | -3.44   | 0.0007      |
| Size of Focal Litter                                            | -0.7624  | 0.3183         | 1144 | -2.40   | 0.0168      |
| Size of Focal Litter × Size of Focal Litter<br>(quadratic term) | 0.0478   | 0.0222         | 1144 | 2.16    | 0.0313      |
| Dam Age, d                                                      | 0.0096   | 0.0033         | 1144 | 2.87    | 0.0041      |
| Age of Older Pups, d                                            | 0.5209   | 0.1165         | 1144 | 4.47    | <0.0001     |
| Age of Older Pups × Age of Older Pups<br>(quadratic term)       | -0.0140  | 0.0042         | 1144 | -3.33   | 0.0009      |
| Number of Older Pups                                            | 0.3071   | 0.0677         | 1144 | 4.54    | <0.0001     |

141

**Suppl. Table 3. Animal husbandry practices of the studied animal facility.**

| i3S Animal Breeding Facility's Characteristics |                                                                                                                                                                                                |
|------------------------------------------------|------------------------------------------------------------------------------------------------------------------------------------------------------------------------------------------------|
| Mouse Strain                                   | C57BL/6J                                                                                                                                                                                       |
| Housing configuration                          | Trios (two adult females and one male) /pairs (one adult female and one male)                                                                                                                  |
| Type of cages                                  | Standard Type II (pair-housing, 268 x 215 x 141 mm) and III (trio-housing, 425 x 276 x 153 mm) Tecniplast Filter-Top Static Cages                                                              |
| Bedding                                        | Corncob bedding (grade 12, ULTRAGENE, Portugal)                                                                                                                                                |
| Nest material                                  | Two to three sheets of white paper towel                                                                                                                                                       |
| Enrichment                                     | Shelter (GLP Semi-detached Dome Home, LBS Biotechnology, United Kingdom)                                                                                                                       |
| Water                                          | <i>Ad libitum</i> from a drinking bottle with nipple, sterilized by reverse osmosis, filtered with a Polyethersulfone filter (SPECTRUM Filtration, England) and ultraviolet light disinfection |
| Food                                           | <i>Ad libitum</i> as 12 mm dry pellets in a hopper (2018S – Mucedola Tecklad for Inotiv, Italy)                                                                                                |
| Cage change routine                            | Once a week on a fixed weekday for each room                                                                                                                                                   |
| Room temperature (target)                      | 21°C (20°C-22°C)                                                                                                                                                                               |
| Light schedule                                 | Cycles of 12 hours of light (7:00h to 19:00h/ 8:00h to 20:00h between end of March and end of October) and 12 hours of dark                                                                    |
| Weaning age (target)                           | 21 days (delayed if pups were too small or if completion of 21 d was on a weekend or holiday)                                                                                                  |
| Breeding start age (target)                    | Dam between eight to nine weeks of age                                                                                                                                                         |
| Retirement age (target)                        | Dams are retired at one year of age or sooner if presenting welfare/health problems                                                                                                            |
| Facility pup-counting routine                  | Pups are counted once between their birth and day seven post-partum by a trained technician, with minimal handling, during cage-change.                                                        |
| Study pup-counting routine                     | Pups were counted daily by a trained scientist at 09.00h, and by the animal care-taker at 16,00h if litters were born either past 09.00h, or on weekends.                                      |

144 **Suppl. Table 4. Confusion Matrix, calculated sensibility and precision for the obtained**  
 145 **Decision Tree describing mouse pre-weaning death.**

|       | Number of pups classified as: |     | Sensibility                                | Precision                                  |
|-------|-------------------------------|-----|--------------------------------------------|--------------------------------------------|
| True: | 0                             | 1   |                                            |                                            |
| 0     | 756                           | 91  | $756 \times 100 \div (756 + 91) = 89.3\%$  | $756 \times 100 \div (756 + 191) = 79.8\%$ |
| 1     | 191                           | 441 | $441 \times 100 \div (191 + 441) = 69.8\%$ | $441 \times 100 \div (91 + 441) = 82.9\%$  |
