# Supplementary material for: Proper micro-environment alleviates mortality in laboratory mouse breeding induced by litter overlap and older dams
Source: PubMed Central journal article supplement — Commun Biol. 2024 Aug 17;7:1008. doi: 10.1038/s42003-024-06654-z (PMC11330512; doi:10.1038/s42003-024-06654-z), 2024-08-17
Supplement: 42003_2024_6654_MOESM3_ESM.pdf [file 42003_2024_6654_MOESM3_ESM.pdf]

## Reporting Summary

Nature Portfolio wishes to improve the reproducibility of the work that we publish. This form provides structure for consistency and transparency in reporting. For further information on Nature Portfolio policies, see our [Editorial Policies](#) and the [Editorial Policy Checklist](#).

### Statistics

For all statistical analyses, confirm that the following items are present in the figure legend, table legend, main text, or Methods section.

- | n/a                                 | Confirmed                                                                                                                                                                                                                                                                                      |
|-------------------------------------|------------------------------------------------------------------------------------------------------------------------------------------------------------------------------------------------------------------------------------------------------------------------------------------------|
| <input type="checkbox"/>            | <input checked="" type="checkbox"/> The exact sample size ( $n$ ) for each experimental group/condition, given as a discrete number and unit of measurement                                                                                                                                    |
| <input type="checkbox"/>            | <input checked="" type="checkbox"/> A statement on whether measurements were taken from distinct samples or whether the same sample was measured repeatedly                                                                                                                                    |
| <input type="checkbox"/>            | <input checked="" type="checkbox"/> The statistical test(s) used AND whether they are one- or two-sided<br><i>Only common tests should be described solely by name; describe more complex techniques in the Methods section.</i>                                                               |
| <input type="checkbox"/>            | <input checked="" type="checkbox"/> A description of all covariates tested                                                                                                                                                                                                                     |
| <input type="checkbox"/>            | <input checked="" type="checkbox"/> A description of any assumptions or corrections, such as tests of normality and adjustment for multiple comparisons                                                                                                                                        |
| <input type="checkbox"/>            | <input checked="" type="checkbox"/> A full description of the statistical parameters including central tendency (e.g. means) or other basic estimates (e.g. regression coefficient) AND variation (e.g. standard deviation) or associated estimates of uncertainty (e.g. confidence intervals) |
| <input type="checkbox"/>            | <input checked="" type="checkbox"/> For null hypothesis testing, the test statistic (e.g. $F$ , $t$ , $r$ ) with confidence intervals, effect sizes, degrees of freedom and $P$ value noted<br><i>Give <math>P</math> values as exact values whenever suitable.</i>                            |
| <input checked="" type="checkbox"/> | <input type="checkbox"/> For Bayesian analysis, information on the choice of priors and Markov chain Monte Carlo settings                                                                                                                                                                      |
| <input type="checkbox"/>            | <input checked="" type="checkbox"/> For hierarchical and complex designs, identification of the appropriate level for tests and full reporting of outcomes                                                                                                                                     |
| <input type="checkbox"/>            | <input checked="" type="checkbox"/> Estimates of effect sizes (e.g. Cohen's $d$ , Pearson's $r$ ), indicating how they were calculated                                                                                                                                                         |

*Our web collection on [statistics for biologists](#) contains articles on many of the points above.*

### Software and code

Policy information about [availability of computer code](#)

Data collection

Data analysis

For manuscripts utilizing custom algorithms or software that are central to the research but not yet described in published literature, software must be made available to editors and reviewers. We strongly encourage code deposition in a community repository (e.g. GitHub). See the Nature Portfolio [guidelines for submitting code & software](#) for further information.

### Data

Policy information about [availability of data](#)

All manuscripts must include a [data availability statement](#). This statement should provide the following information, where applicable:

- Accession codes, unique identifiers, or web links for publicly available datasets
- A description of any restrictions on data availability
- For clinical datasets or third party data, please ensure that the statement adheres to our [policy](#)

An excel datafile with all data used in this study, including numerical source data for graphs, is available from the FigShare database (accession code: 10.6084/m9.figshare.25040630).

## Research involving human participants, their data, or biological material

Policy information about studies with [human participants or human data](#). See also policy information about [sex, gender \(identity/presentation\), and sexual orientation](#) and [race, ethnicity and racism](#).

|                                                                    |                                                                                                          |
|--------------------------------------------------------------------|----------------------------------------------------------------------------------------------------------|
| Reporting on sex and gender                                        | <input type="text" value="This study did not involve human participant, data, or biological material."/> |
| Reporting on race, ethnicity, or other socially relevant groupings | <input type="text" value="This study did not involve human participant, data, or biological material."/> |
| Population characteristics                                         | <input type="text" value="This study did not involve human participant, data, or biological material."/> |
| Recruitment                                                        | <input type="text" value="This study did not involve human participant, data, or biological material."/> |
| Ethics oversight                                                   | <input type="text" value="This study did not involve human participant, data, or biological material."/> |

Note that full information on the approval of the study protocol must also be provided in the manuscript.

## Field-specific reporting

Please select the one below that is the best fit for your research. If you are not sure, read the appropriate sections before making your selection.

Life sciences       Behavioural & social sciences       Ecological, evolutionary & environmental sciences

For a reference copy of the document with all sections, see [nature.com/documents/nr-reporting-summary-flat.pdf](https://www.nature.com/documents/nr-reporting-summary-flat.pdf)

## Life sciences study design

All studies must disclose on these points even when the disclosure is negative.

|                 |                                                                                                                                                                                                                                                                             |
|-----------------|-----------------------------------------------------------------------------------------------------------------------------------------------------------------------------------------------------------------------------------------------------------------------------|
| Sample size     | <input type="text" value="3380 C57BL/6 mouse pups (experimental unit)."/>                                                                                                                                                                                                   |
| Data exclusions | <input type="text" value="There were no data exclusions."/>                                                                                                                                                                                                                 |
| Replication     | <input type="text" value="3380 C57BL/6 mouse pups were used from a total of 509 litters, 6.6 ± 2.8 (range 1-14 pups) born per litter. Litter was considered a random effect to account for clustering."/>                                                                   |
| Randomization   | <input type="text" value="509 litters, randomly selected in 3 breeding rooms, had their pups counted daily. A smaller subset of 172 litters was randomly selected for cage micro-environment monitoring."/>                                                                 |
| Blinding        | <input type="text" value="Data analysis involved evaluation of pup numbers (born, weaned, dead) as a function of social and micro-environmental conditions that naturally happened in the cage, all objective measures, thus we considered blinding not to be necessary."/> |

## Reporting for specific materials, systems and methods

We require information from authors about some types of materials, experimental systems and methods used in many studies. Here, indicate whether each material, system or method listed is relevant to your study. If you are not sure if a list item applies to your research, read the appropriate section before selecting a response.

### Materials & experimental systems

| n/a                                 | Involvement                                                     |
|-------------------------------------|-----------------------------------------------------------------|
| <input checked="" type="checkbox"/> | <input type="checkbox"/> Antibodies                             |
| <input checked="" type="checkbox"/> | <input type="checkbox"/> Eukaryotic cell lines                  |
| <input checked="" type="checkbox"/> | <input type="checkbox"/> Palaeontology and archaeology          |
| <input type="checkbox"/>            | <input checked="" type="checkbox"/> Animals and other organisms |
| <input checked="" type="checkbox"/> | <input type="checkbox"/> Clinical data                          |
| <input checked="" type="checkbox"/> | <input type="checkbox"/> Dual use research of concern           |
| <input checked="" type="checkbox"/> | <input type="checkbox"/> Plants                                 |

### Methods

| n/a                                 | Involvement                                     |
|-------------------------------------|-------------------------------------------------|
| <input checked="" type="checkbox"/> | <input type="checkbox"/> ChIP-seq               |
| <input checked="" type="checkbox"/> | <input type="checkbox"/> Flow cytometry         |
| <input checked="" type="checkbox"/> | <input type="checkbox"/> MRI-based neuroimaging |

## Animals and other research organisms

Policy information about [studies involving animals](#); [ARRIVE guidelines](#) recommended for reporting animal research, and [Sex and Gender in Research](#)

|                         |                                                                                                                                                                                                                                                                                                                          |
|-------------------------|--------------------------------------------------------------------------------------------------------------------------------------------------------------------------------------------------------------------------------------------------------------------------------------------------------------------------|
| Laboratory animals      | C57BL/6J laboratory mice, female and male adults of 58d to 493d of age, part of the i3S's breeding colony. Thus, no animals were generated solely for the purpose of this study. Pups of their litters (509 litters) were daily counted until 4d post-partum and at weaning (21d post-partum).                           |
| Wild animals            | No wild animals were used in this study.                                                                                                                                                                                                                                                                                 |
| Reporting on sex        | Results apply to male and female pups.                                                                                                                                                                                                                                                                                   |
| Field-collected samples | No samples were collected in this study.                                                                                                                                                                                                                                                                                 |
| Ethics oversight        | This study was part of the "Alive Pup" project under licence ID "DGAV 15188/2017-06-30" issued by the national Directorate-General for Food and Veterinary, with approval (ID "2016-10") of the i3S's Institutional Animal Care and Use Committee. We have complied with all relevant ethical regulations for animal use |

Note that full information on the approval of the study protocol must also be provided in the manuscript.

## Plants

|                       |                                    |
|-----------------------|------------------------------------|
| Seed stocks           | No plants were used in this study. |
| Novel plant genotypes | No plants were used in this study. |
| Authentication        | No plants were used in this study. |
